# Supplementary material
Source: PubMed Central journal article supplement (PMC3293544)

## SUPPLEMENTAL MATERIALS AND METHODS

### **$\beta$ -CATENIN/CBP-DEPENDENT REGULATION OF TGF- $\beta$ -MEDIATED EPITHELIAL-MESENCHYMAL TRANSITION (EMT) BY SMAD3**

**Zhou, Beiyun<sup>1</sup>, Yixin Liu<sup>1</sup>, Michael Kahn<sup>2</sup>, David K. Ann<sup>5</sup>, Arum Han<sup>4</sup>, Hongjun Wang<sup>1</sup>, Cu Nguyen<sup>2</sup>, Per Flodby, Qian Zhong<sup>1</sup>, Manda S. Krishnaveni<sup>1</sup>, Janice M. Liebler<sup>1</sup>, Parviz Minoo<sup>3</sup>, Edward D. Crandall<sup>1</sup> and Zea Borok<sup>1,2</sup>**

From <sup>1</sup>Will Rogers Institute Pulmonary Research Center, Division of Pulmonary and Critical Care Medicine, Department of Medicine, <sup>2</sup>Department of Biochemistry and Molecular Biology, <sup>3</sup>Department of Pediatrics, <sup>4</sup>Department of Dermatology and Norris Comprehensive Cancer Center, University of Southern California, Los Angeles, CA; <sup>5</sup>Department of Molecular Pharmacology, City of Hope Beckman Research Institute, Duarte, CA

Running head:  $\beta$ -catenin/CBP and Smad3 interactions in EMT

Address correspondence and reprint requests to: Zea Borok, M.D., IRD 620, 2020 Zonal Avenue, Los Angeles, CA 90033. Telephone: (323) 226-7923; Fax: (323) 442-2611; E-mail: zborok@usc.edu

### **EXPERIMENTAL PROCEDURES**

*Cell treatment.* To evaluate synergy between TGF- $\beta$ 1 and Wnt/ $\beta$ -catenin pathways in mediating EMT in AEC, RLE-6TN cells were treated with TGF- $\beta$ 1 (2.5 ng/ml) and/or LiCl (7.5 mM) and proteins were harvested for Western analysis after 6 days. To examine effects of ICG-001 on TGF- $\beta$  induction of  $\alpha$ -SMA protein by Western blotting, RLE-6TN cells were seeded at 12,000 cells/well in 24-well plates and treated with TGF- $\beta$ 1 (0.5 ng/ml)  $\pm$  ICG-001 at concentrations of 2.5-7.5  $\mu$ M for 2 days. In this and all subsequent experiments, vehicle (4 mM HCl containing 0.1% BSA) and DMSO were used as TGF- $\beta$ 1 and ICG-001 controls, respectively. To evaluate effects of ICG-001 on TGF- $\beta$ -induced morphological changes by immunostaining, RLE-6TN cells were seeded at 8,000 cells/well in 8-well chamber slides and treated with TGF- $\beta$ 1 (0.5 ng/ml)  $\pm$  ICG-001 (7.5  $\mu$ M) for 4 days. To assess the effects of SIS3 on TGF- $\beta$  induction of  $\alpha$ -SMA protein, RLE-6TN cells plated at a density of 12,000 cells/well in 24-well plates were treated from the time of plating with TGF- $\beta$ 1 (2.5 ng/ml) together with SIS3 (0.5-6  $\mu$ M; DMSO used as control) and harvested for Western analysis after 4 days. To assess nuclear translocation of  $\beta$ -catenin, nuclear extracts were harvested from RLE-6TN cells treated with TGF- $\beta$ 1 for 3 or 6 hours. Wnt3a conditioned medium harvested from L-Wnt-3A cells (L-M(TK-) cells stably expressing Wnt-3A (ATCC) was used as positive control. Timing of treatments with TGF- $\beta$  varied depending on specific endpoints being evaluated. For western analyses to evaluate  $\alpha$ -SMA protein, cells were treated with TGF- $\beta$  for at least 2 days since significant induction of  $\alpha$ -SMA was only observed after 48 hours. For morphologic analyses, TGF- $\beta$  treatment was for 4 days to allow full phenotypic transition. For evaluation of synergy between TGF- $\beta$  and LiCl, treatment was for 6 days since synergistic effects were not observed at earlier timepoints, consistent with the observation that induction of  $\alpha$ -SMA by LiCl alone was not seen until day 4 (not shown). Nuclear  $\beta$ -catenin induction in response to TGF- $\beta$  was evaluated at 3 and 6 hours and was timed to precede induction of  $\alpha$ -SMA.

*Western analysis.* AEC or RLE-6TN cells were lysed in 2% SDS buffer (62.5 mM Tris-HCl, 2% SDS and 10% glycerol). Samples were separated by SDS-PAGE and transferred to Immuno-Blot polyvinylidene fluoride (PVDF) membranes (Bio-Rad, Hercules, CA). Membranes were blocked with 5% non-fat milk in 20 mM Tris (pH 7.5), 0.5 M NaCl and 0.01% Tween 20 overnight at 4°C, followed by incubation with primary Ab for 1 hour at room temperature (RT). After washing with PBS (pH 7.2), membranes were incubated with goat anti-rabbit or anti-mouse secondary Ab (Promega, Madison, MI). Peroxidase activity was detected with enhanced chemiluminescence (ECL) or Super Signal (Pierce, Rockford, IL) and images were analyzed using a FluorChem imager (Alpha Innotech, San Leandro, CA).

*Transient transfection assays.* RLE-6TN cells were plated at  $6 \times 10^4$  cells/well in 24-well plates 24 hours before transfection. Cells were co-transfected with 0.5  $\mu\text{g}$  of a LEF/TCF TOPFLASH reporter or FOPFLASH control (from R.T. Moon, Howard Hughes Medical Institute, Seattle, WA) using Lipofectamine 2000 (Invitrogen). 24 hours following transfection, cells were treated with TGF- $\beta$ 1 (2.5 ng/ml) for an additional 24 hours. To establish that TGF- $\beta$ 1-induced activation of TOPFLASH involved activation of  $\beta$ -catenin, the TOPFLASH reporter was co-transfected with 0.25  $\mu\text{g}$  of ICAT expression vector pCS2/ICAT using Lipofectamine 2000, followed by treatment with TGF- $\beta$ 1 for 24 hours. To confirm a role for activation of  $\beta$ -catenin in TGF- $\beta$ 1-induced  $\alpha$ -SMA expression, RLE-6TN cells transduced with a lentiviral expression vector containing Myc-tagged ICAT cDNA, pRRL.hCMV.Sin.mycICAT.IRES.GFP, or control vector, pRRL.hCMV.Sin.IRES GFP, were co-transfected with 0.75  $\mu\text{g}$  of  $\alpha$ -SMA-luciferase ( $\alpha$ -SMA-Luc) reporter encompassing 764 bp of the proximal rat  $\alpha$ -SMA promoter, which was amplified from rat genomic DNA with primers 5'-ACGGTCCTTAAGCATGATAT-3' and 5'-CTTACCCTGATGGCGACTGGCTGG-3' according to the published sequence (GenBank, S76011) and cloned into pGL3-Basic vector, followed by treatment with TGF- $\beta$ 1 (2.5 ng/ml) for 48 hours. To evaluate the effect of Smad3 on  $\alpha$ -SMA promoter activity, RLE-6TN cells were co-transfected with 0.4  $\mu\text{g}$  of  $\alpha$ -SMA-Luc and 0.25  $\mu\text{g}$  of Smad3 expression vector pRK-5F/Smad3 using Lipofectamine 2000. To evaluate the functional importance of two putative Smad3-binding elements (SBE) for  $\alpha$ -SMA promoter activity in epithelial cells, two Smad binding site (SBE1 and SBE2) mutants,  $\alpha$ -SMAp-Luc-SBEm1 and  $\alpha$ -SMAp-Luc-SBEm2, as well as wild type  $\alpha$ -SMAp-Luc (from S. H. Phan, University of Michigan, Ann Arbor, MI) were transfected into RLE-6TN cells, followed by treatment with TGF- $\beta$ 1 (2.5 ng/ml) for 48 hours.

*Knockdown of  $\beta$ -catenin and Smad3.* To knockdown  $\beta$ -catenin, RLE-6TN cells were plated at  $4 \times 10^4$  cells/well in 24-well plates one day before transfection in 500  $\mu\text{l}$  of growth medium without antibiotics. 40 pmoles of small-interfering RNA (siRNA) targeting the rat  $\beta$ -catenin gene (sequence: 5'-CCACGCUGCAUAAUCUCCUGCUACA-') (Invitrogen) or control nontargeting siRNA were complexed with 1.5  $\mu\text{l}$  Lipofectamine 2000 in 100  $\mu\text{l}$  of Opti-MEM (Invitrogen) and added to each well. After 6 hours, medium was replaced with fresh medium supplemented with TGF- $\beta$ 1 (0.5 ng/ml) for an additional 48 hours. To knockdown Smad3, RLE-6TN cells were transduced with lentivirus expressing Smad3 short hairpin RNA (shRNA) (#V3LMM-486080, Open Biosystems, Huntsville, AL) or control pGIPZ nonsilencing shRNA (Open Biosystems) using polybrene (final concentration 8  $\mu\text{g}/\text{ml}$ ).

*Preparation of nuclear extracts and co-immunoprecipitation.* Nuclear extracts were harvested from RLE-6TN cells  $\pm$  TGF- $\beta$  (2.5 ng/ml)  $\pm$  SIS3 (3  $\mu\text{M}$ ) (Calbiochem, La Jolla, CA) or RLE-6TN cells  $\pm$  TGF- $\beta$  (0.5 ng/ml)  $\pm$  ICG-001 for 24 hours using the ProteoExtract subcellular protein extraction kit (Calbiochem). Protein concentration of nuclear extracts was determined using the Bio-Rad Protein Assay Kit. Nuclear extracts (100  $\mu\text{g}$ ) were diluted in protein binding buffer (PBB; 20 mM HEPES, 75 mM KCl, 2.5 mM  $\text{MgCl}_2$ , 1 mM DTT, 0.1% NP-40 and protease inhibitor cocktail III (5  $\mu\text{L}/\text{ml}$ , Calbiochem)) to a final volume of 1000  $\mu\text{l}$  in a 1.5 mL eppendorf tube, followed by addition of 2  $\mu\text{g}$  of rabbit IgG and 20  $\mu\text{l}$  of protein-A/G plus-agarose (Santa Cruz Biotechnology) equilibrated in PBB. After incubation on a rotator for 2 hours at 4  $^\circ\text{C}$ , samples were centrifuged and supernatants collected, followed by addition of 2  $\mu\text{g}$  of rabbit polyclonal anti-CBP (sc-369, Santa Cruz Biotechnology), or anti-Smad3 (ab28379, Abcam) Ab, or normal rabbit IgG (sc-2027, Santa Cruz Biotechnology). Following incubation on a rotator overnight at 4  $^\circ\text{C}$ , 30  $\mu\text{l}$  of 50% slurry of protein-A/G plus-agarose equilibrated in PBB was added and incubated for 1 hour at 4  $^\circ\text{C}$ . Protein-A/G plus-agarose beads were washed 5 times by addition of 500  $\mu\text{l}$  of PBB and incubation for 5 min at 4  $^\circ\text{C}$ . Precipitated complexes were eluted by addition of 30  $\mu\text{L}$  of

2×Laemmli buffer containing 2-mercaptoethanol and boiled for 5 min before loading for SDS-PAGE, and analyzed for  $\beta$ -catenin, Smad3, and CBP using Abs mentioned above.

*Production of lentivirus in 293T cells.* A myc-tagged ICAT cDNA (from B. M. Gumbiner, University of Virginia, Charlottesville, VA) from pCS2/ICAT was cloned into the lentivirus backbone vector pRRL.hCMV.Sin.IRES.GFP. Infectious lentivirus was created by cotransfection of pRRL.hCMV.Sin.mycICAT.IRES.GFP plasmid with pCMV $\Delta$ R8.91 and pMD.G into human 293T cells. The infection cocktail (500  $\mu$ l), consisting of 12  $\mu$ g pRRL.hCMV.Sin.mycICAT.IRES.GFP or control pRRL.hCMV.Sin.IRES.GFP, 8  $\mu$ g pCMV $\Delta$ R8.91, 3.5  $\mu$ g pMD.G, 69  $\mu$ l 2 M CaCl<sub>2</sub> and H<sub>2</sub>O, was mixed with 500  $\mu$ l warm HBS (220 mM NaCl, 60 mM HEPES and 1.5 mM Na<sub>2</sub>HPO<sub>4</sub>; pH 7.2), added dropwise to 293T cells plated on 100 mm culture dishes and incubated at 37°C overnight. Virus was harvested after 48 hours, filtered through 0.45  $\mu$ m filters, and concentrated by centrifugation at 20,000 g at 4°C overnight. Virus was then resuspended in medium, aliquoted and stored at -80°C.

### FIGURE LEGENDS

**Fig. S1.** Effect of TGF- $\beta$  on GSK-3 $\beta$  phosphorylation in RLE-6TN cells. Representative Western blot (A) and quantitative analysis (B) of phospho-GSK-3 $\beta$  following treatment of RLE-6TN cells with TGF- $\beta$ 1 (2.5 ng/ml) for indicated times (n=3, \* = p<0.05 compared to t=0). Treatment with Wnt3a conditioned medium is used as a positive control. eIF-4E is used as loading control.

**Fig. S2.** Effect of TGF- $\beta$  on Smad3 phosphorylation in RLE-6TN cells. Representative Western blot (A) and quantitative analysis (B) of phospho-Smad3 (p-Smad3) protein in lysates from RLE-6TN cells treated with TGF- $\beta$  1 (2.5 ng/ml). eIF-4E is used as loading control (n=3, \* = p<0.05 (significantly different from TGF- $\beta$  vehicle)).

**Fig. S3.**  $\beta$ -catenin associates with SBE1, not SBE2 at  $\alpha$ -SMA promoter. ChIP assay was performed with anti- $\beta$ -catenin Ab for pull-down using chromatin harvested from RLE-6TN cells treated with TGF- $\beta$ 1. Enrichment of SBE1-containing (lane 3), but not SBE2-containing region (lane 7) at the  $\alpha$ -SMA promoter was identified. IgG was used as ChIP negative control (lane 4 and 8). Lane 2 and 6 are input. Lane 5 and 9 are no template for PCR negative control, and M denotes molecular weight marker (bp).

**Fig. S4.** Controls for immunofluorescence staining for  $\beta$ -catenin and Smad3 colocalization in hyperplastic type II cells of IPF lung tissue with IgG,  $\beta$ -catenin (red) or Smad3 (green) alone. Nuclei (blue) are stained with DAPI. Scale bar = 20  $\mu$ m.

Fig. S1

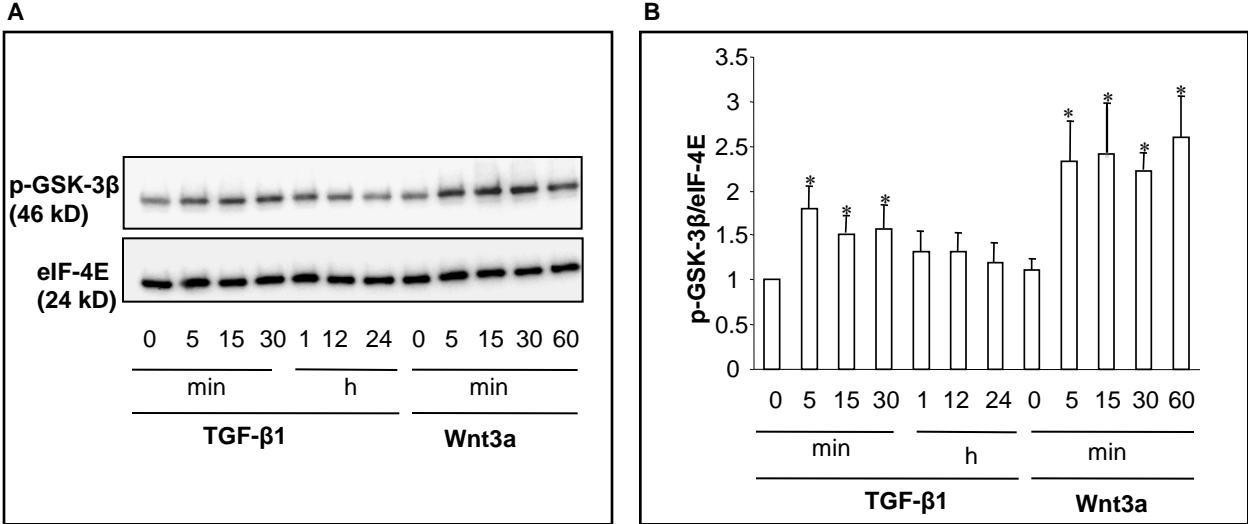

Fig. S2

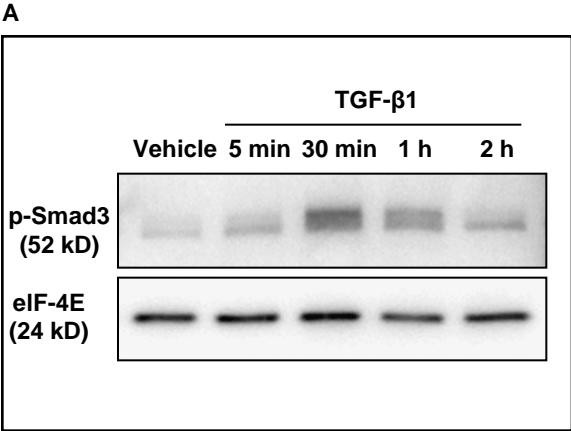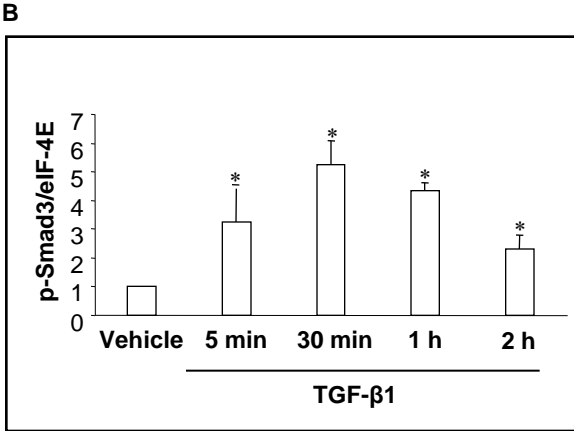



Fig. S4

Mouse IgG + Rabbit IgG

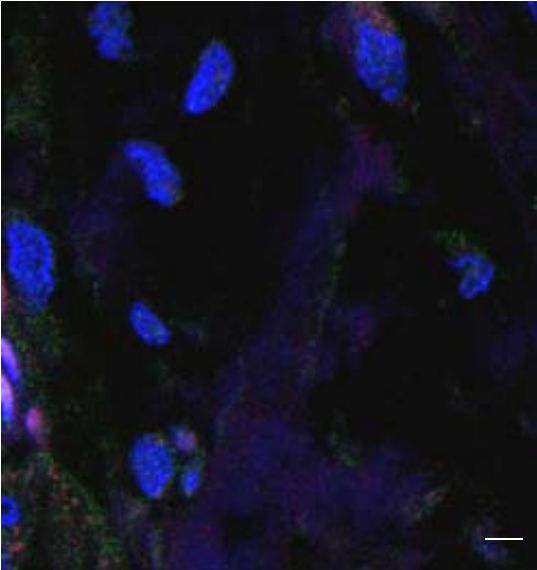

$\beta$ -catenin + Rabbit IgG

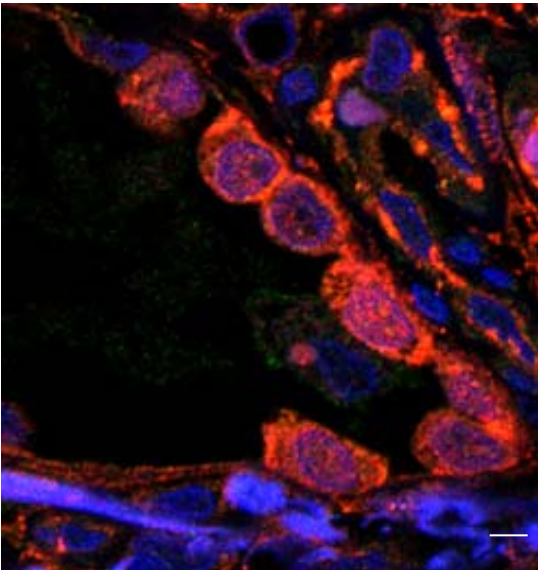

Mouse IgG + Smad3

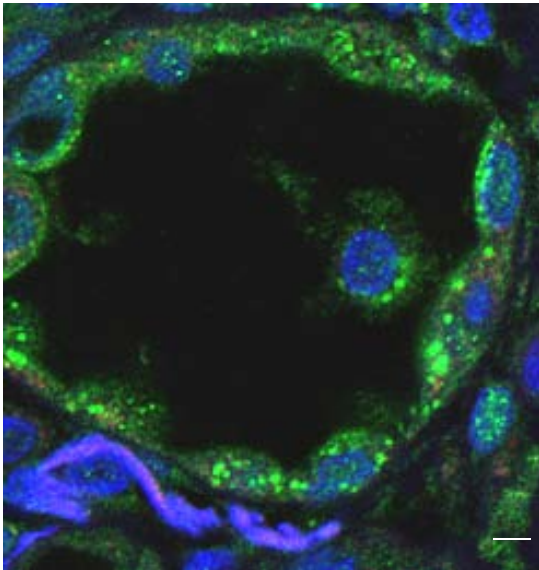

Supplement: supp_M111.276311_jbc.M111.276311-1.pdf [file supp_M111.276311_jbc.M111.276311-1.pdf]
